# Supplementary material for: Unveiling the anode reaction environment in a CO2 electrolyzer to provide a guideline for anode development
Source: Royal Society of Chemistry journal article supplement (doi:10.1039/d3ta03774f), 2023-01-01
Supplement: d3ta03774f1.pdf [file d3ta03774f1.pdf]

## Supporting Information

Unveiling the Anode Reaction Environment in a CO<sub>2</sub> Electrolyzer to  
Provide a Guideline for Anode Development

*Ji Hwan Song<sup>a</sup>, Seohyeon Ka<sup>a</sup>, Chulwan Lim<sup>a,b</sup>, Man Ho Han<sup>a</sup>,*

*Dong Ki Lee<sup>a,c,d</sup>, Hyung-Suk Oh<sup>\*a,e</sup> and Woong Hee Lee<sup>\*a</sup>*

<sup>a</sup> Clean Energy Research Center, Korea Institute of Science and Technology (KIST),

Hwarang-ro 14-gil 5, Seongbuk-gu, Seoul, 02792, Republic of Korea

<sup>b</sup> Department of Chemical and Biological Engineering, Korea University, Anam-ro 145,

Seongbuk-gu, Seoul, 02841, Republic of Korea

<sup>c</sup> KU-KIST Graduate School of Energy and Environment, Korea University, Seoul, 02841,

Republic of Korea

<sup>d</sup> Department of Chemical and Biomolecular Engineering, Yonsei-KIST Convergence

Research Institute, Yonsei University, Seoul 03722, Republic of Korea

<sup>e</sup> KIST-SKKU Carbon-Neutral Research Center, Sungkyunkwan University, Seobu-ro 2066,

Jangan-gu, Suwon, 16419, Republic of Korea

### Corresponding Authors

\*E-mail address: [abcabac@kist.re.kr](mailto:abcabac@kist.re.kr) (W. H. Lee), [hyung-suk.oh@kist.re.kr](mailto:hyung-suk.oh@kist.re.kr) (H.-S. Oh)

Tel.: +82-2-958-5824 (W. H. Lee), +82-2-958-5292 (H.-S. Oh)

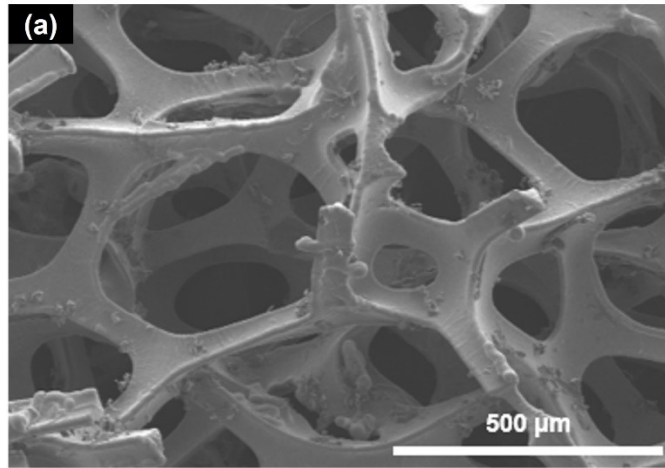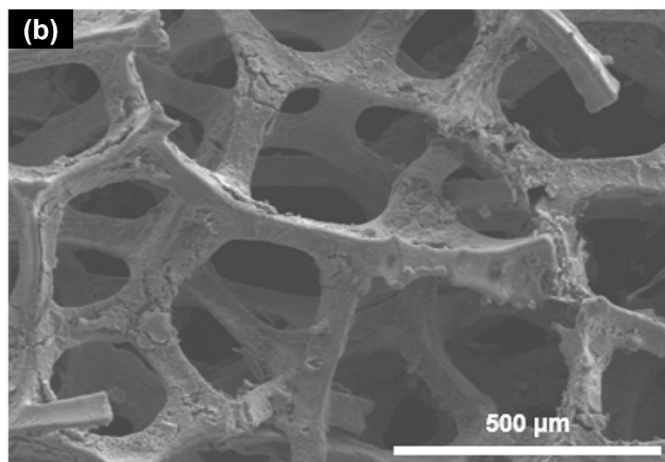

19

20 **Figure S1.** SEM images of (a) Ni-F and (b) NiFe-F at low magnification (x100).

21

22

23

24

25

26

27

28

29

30

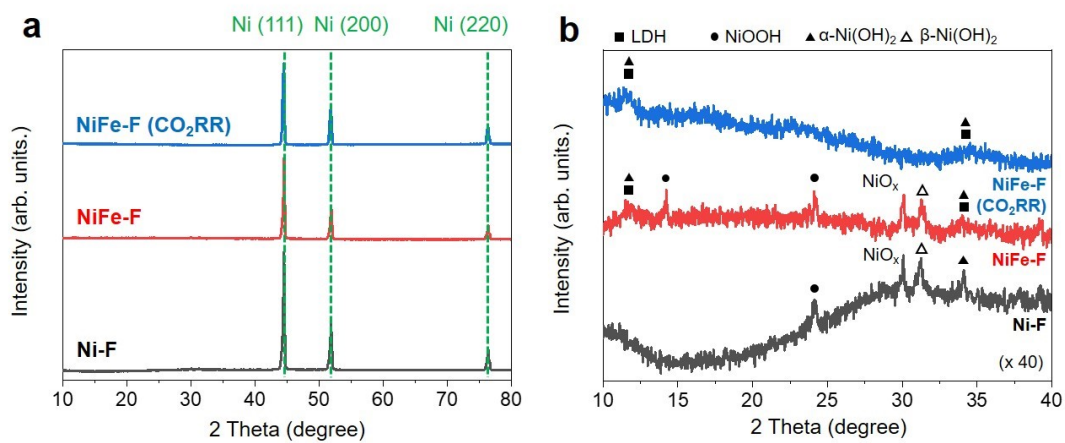

31

32 **Figure S2.** XRD patterns of Ni-F, NiFe-F and NiFe-F collected after CO<sub>2</sub>RR in the range of

33 (a) 10-80° (2 theta) and (b) 10-40° (2 theta).

34

35

36

37

38

39

40

41

42

43

44

45

46

47

48

49

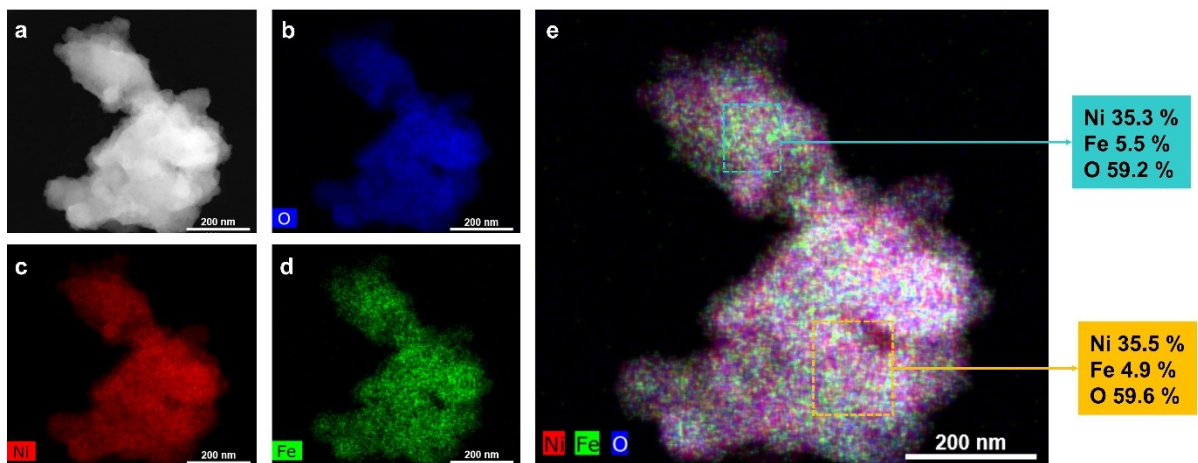

50

51 **Figure S3.** EDS elemental mapping images of NiFe-F using TEM. (a) HAADF image, (b) O  
 52 element, (c) Ni element, (d) Fe element, (e) overlapped image and elemental composition  
 53 comparison between different points. (x160k magnification)

54

55

56

57

58

59

60

61

62

63

64

65

66

67

68

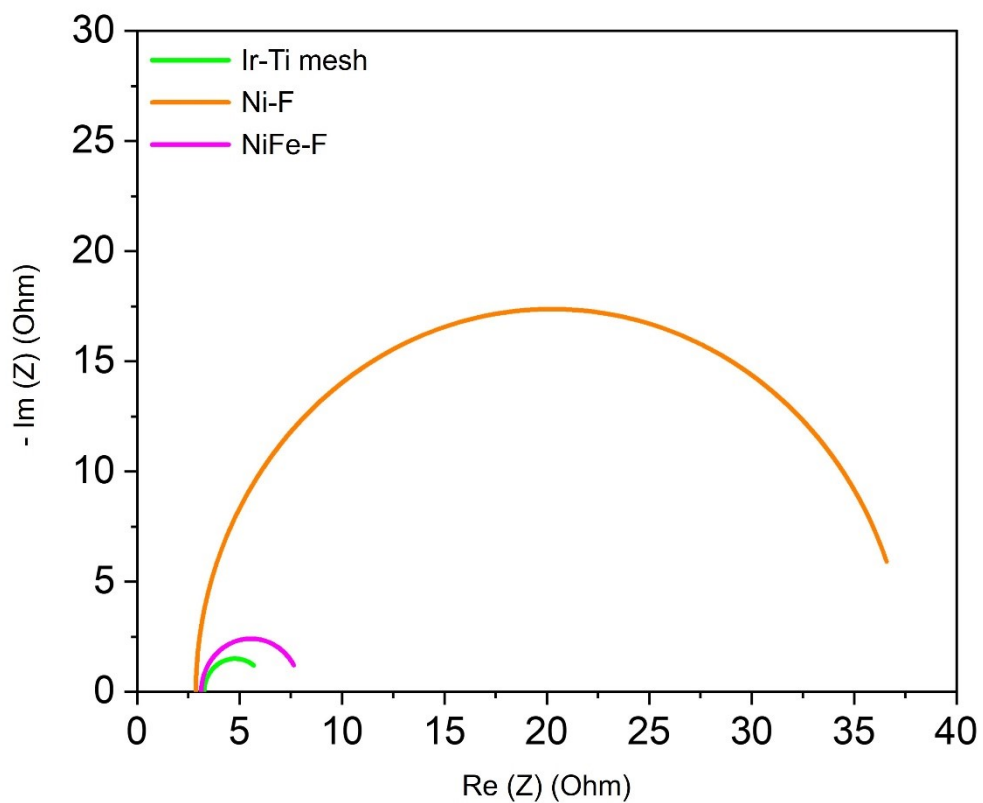

69

70 **Figure S4.** EIS Nyquist plots of Ir-Ti mesh, Ni-F, and NiFe-F in neutral (CO<sub>2</sub>-purged 1 M  
71 KHCO<sub>3</sub>) electrolyte, performed at 1.63 V (vs. RHE) under a frequency range from 100 kHz to  
72 1 Hz.

73

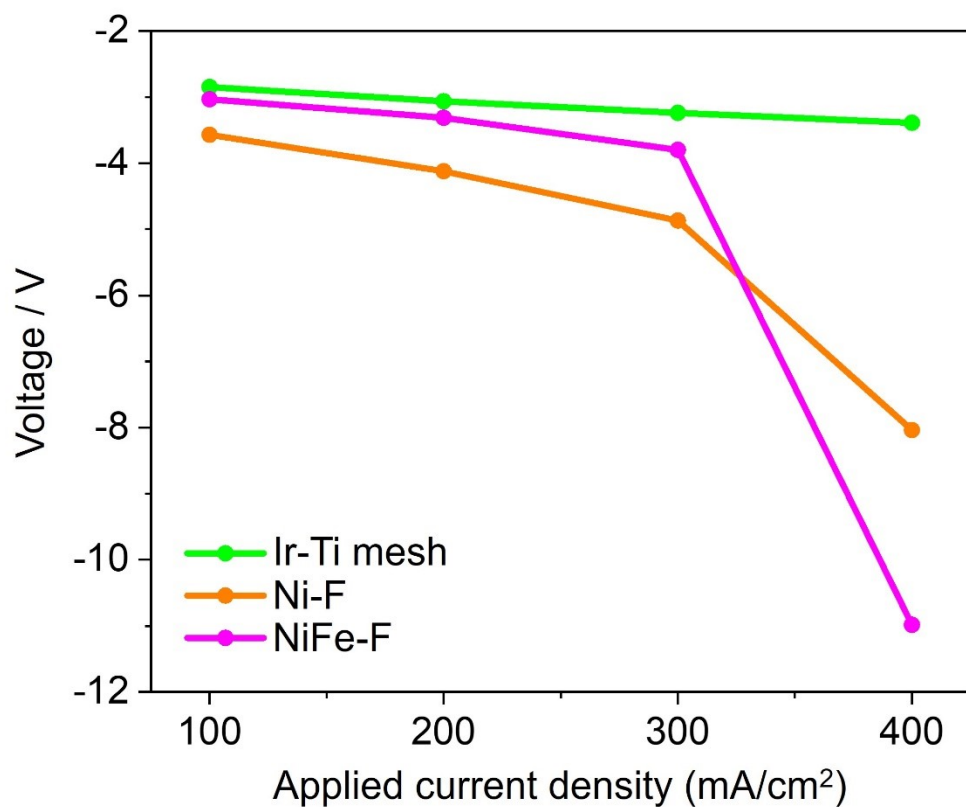

74

75 **Figure S5.** Cell voltages during zero-gap single cell neutral CO<sub>2</sub>RR for each type of anode  
76 used, plotted as a function of applied current density (Figure 2b).

77

78

79

80

81

82

83

84

85

86

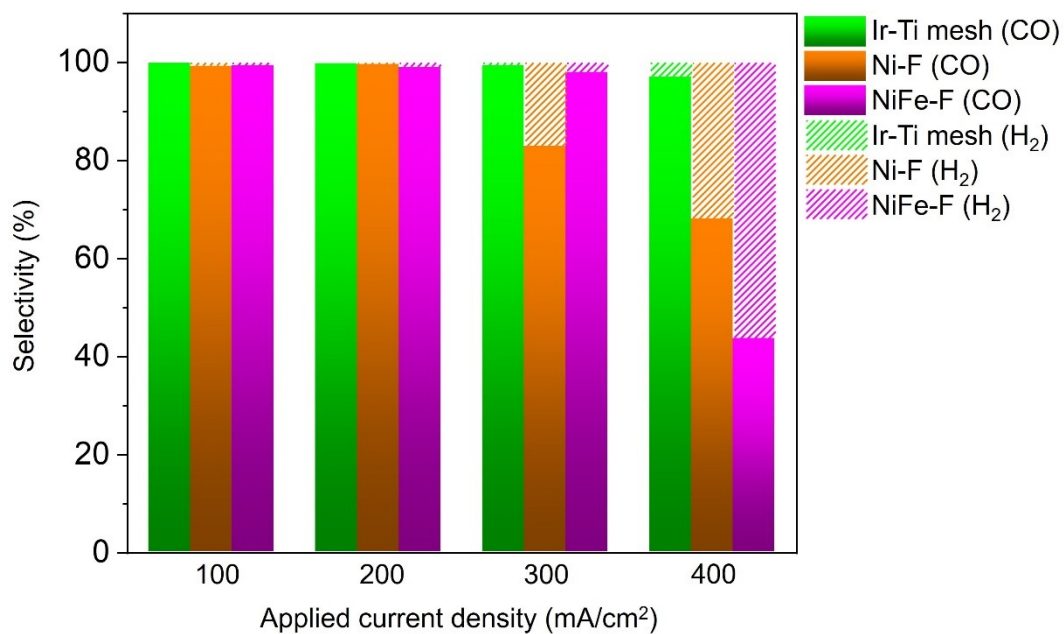

87

88 **Figure S6.** Selectivities for CO and H<sub>2</sub> at each applied current densities during zero-gap single  
 89 cell neutral CO<sub>2</sub>RR.

90

91

92

93

94

95

96

97

98

99

100

101

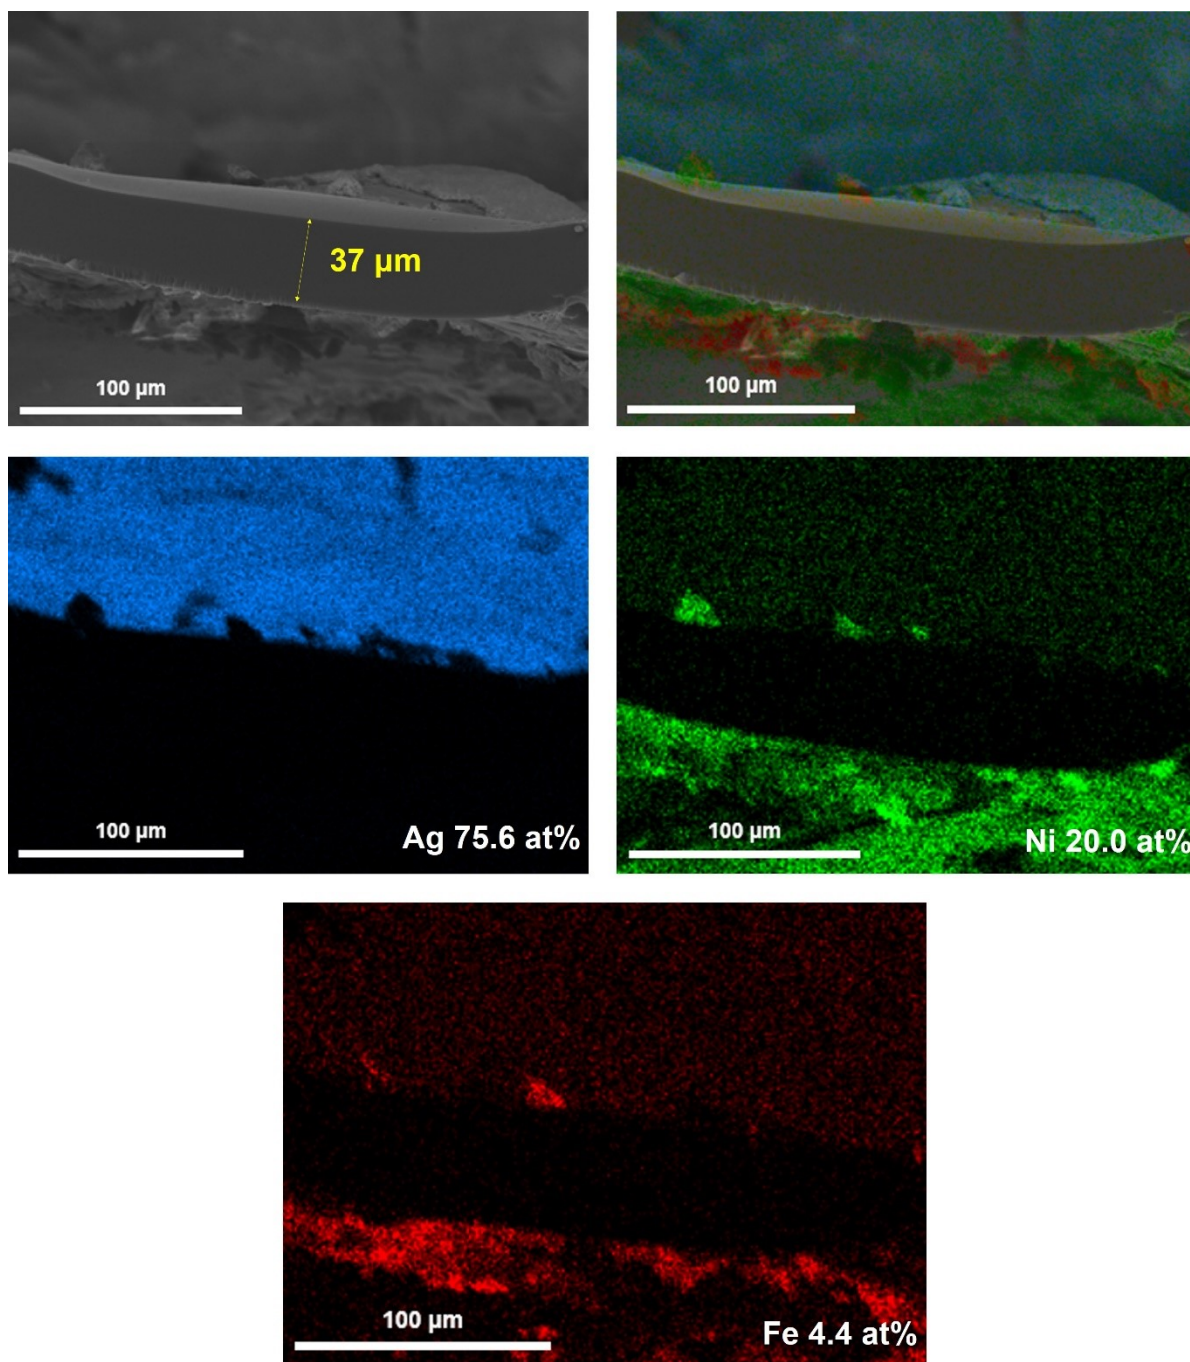

102

103 **Figure S7.** EDS mapping on Ag, Ni, and Fe over the cross-section of the AEM collected after  
 104 CO<sub>2</sub>RR reaction using SEM. NiFe-F was used as the anode (Blue: Ag, Green: Ni, Red: Fe).

105

106

107

108



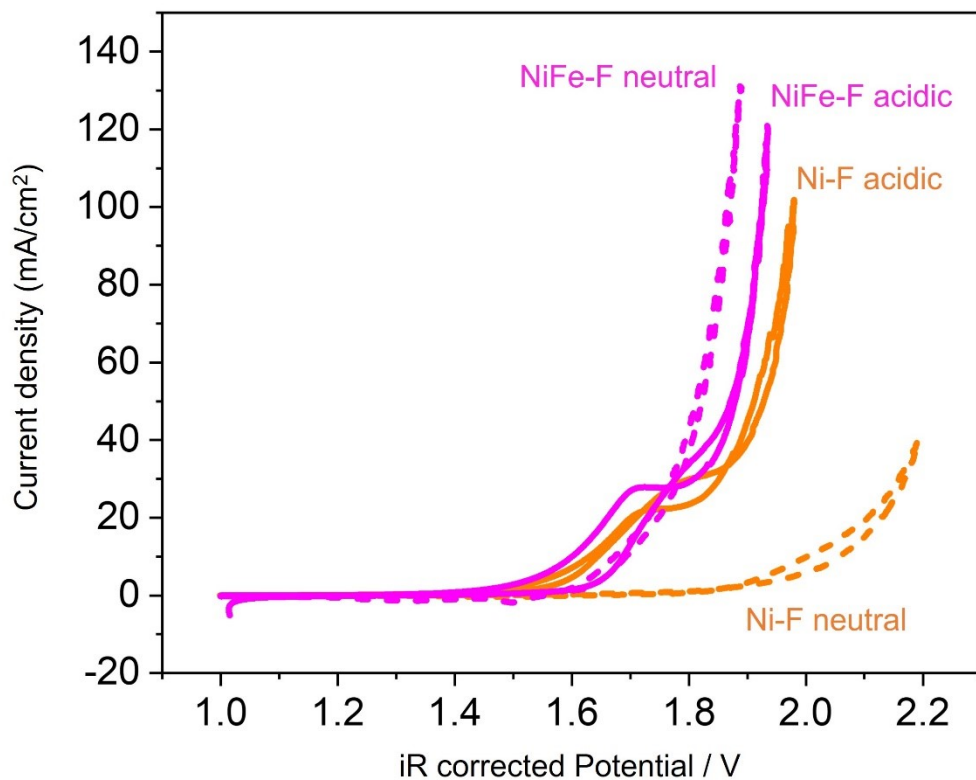

109

110 **Figure S8.** Half-cell OER activity of Ni-F and NiFe-F electrodes in acidic electrolyte (pH 2,  
 111 mixed solution of 0.5 M H<sub>2</sub>SO<sub>4</sub> and 1 M KHCO<sub>3</sub>). Scan range was 1.0 – 2.3 V (vs. RHE) and  
 112 scan rate was 2 mV/s. (Dotted lines: CV curves during neutral OER)

113

114

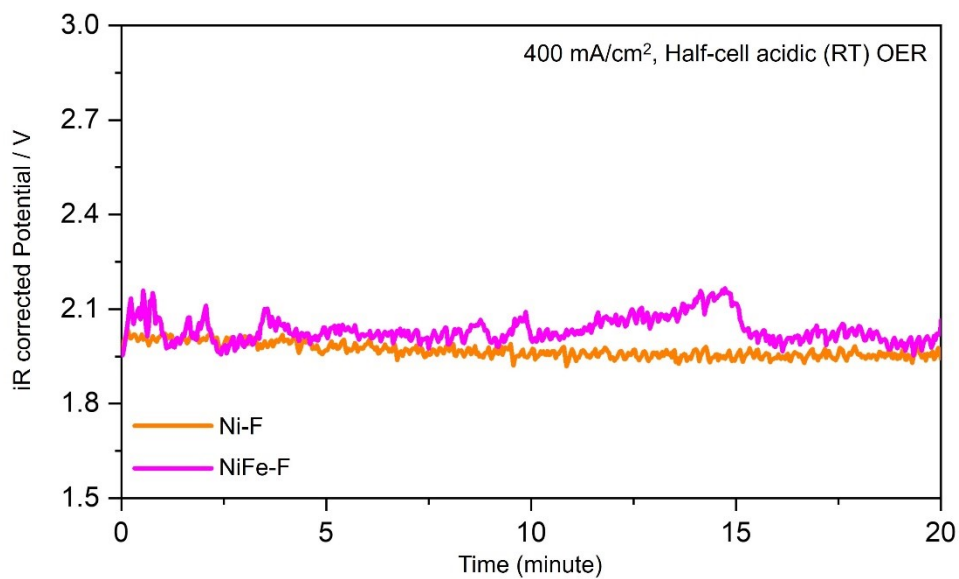

115

116 **Figure S9.** CP measurements during half-cell OER activity of Ni-F and NiFe-F electrodes in  
117 acidic electrolyte (pH 2, mixed solution of 0.5 M H<sub>2</sub>SO<sub>4</sub> and 1 M KHCO<sub>3</sub>) at 400 mA/cm<sup>2</sup> for  
118 20 minutes.

119

120

121

122

123

124

125

126

127

128

129

130

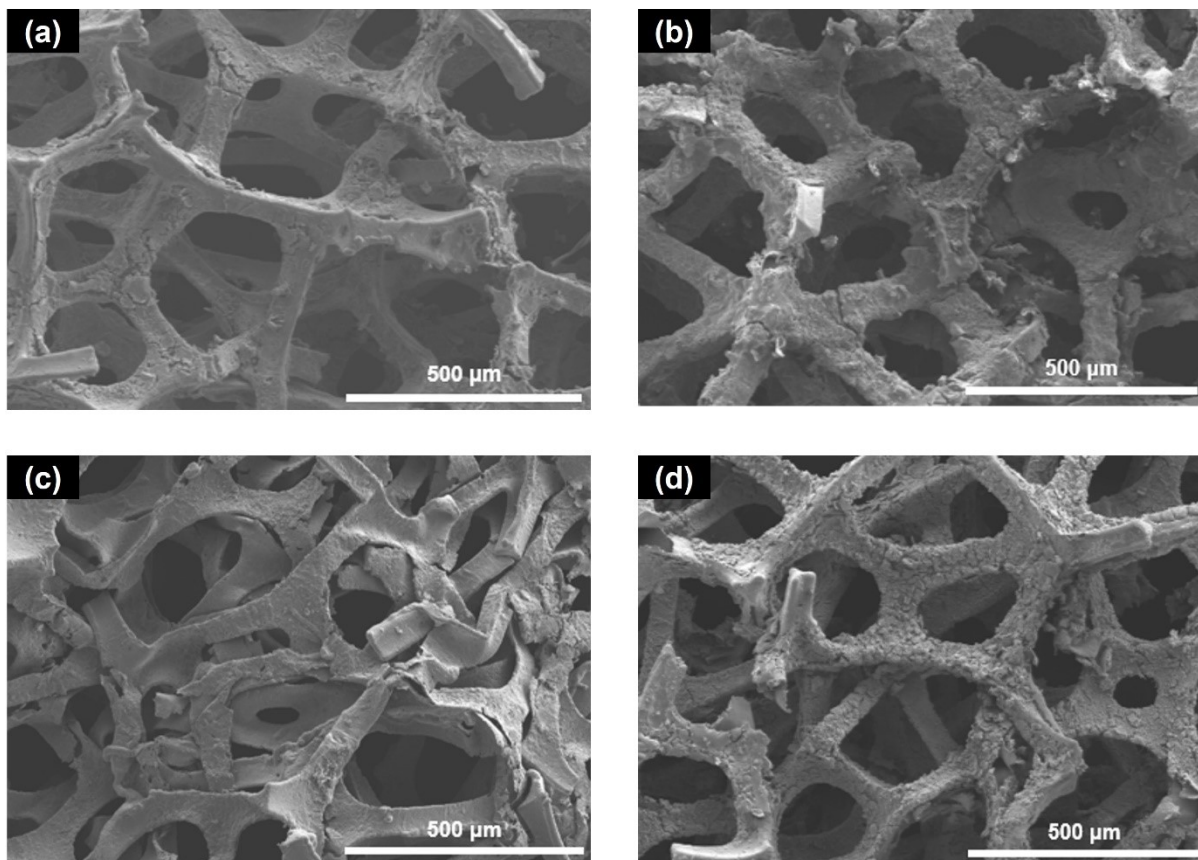

131

132 **Figure S10.** SEM images of NiFe-F electrodes (a) after electrochemical oxidation at 1 M KOH  
133 (alkaline activation), (b) after half-cell neutral OER, (c) after half-cell acidic OER, and (d) after  
134 CO<sub>2</sub>RR single-cell activity test (x100 magnification).

135

136

137

138

139

140

141

142

143

144

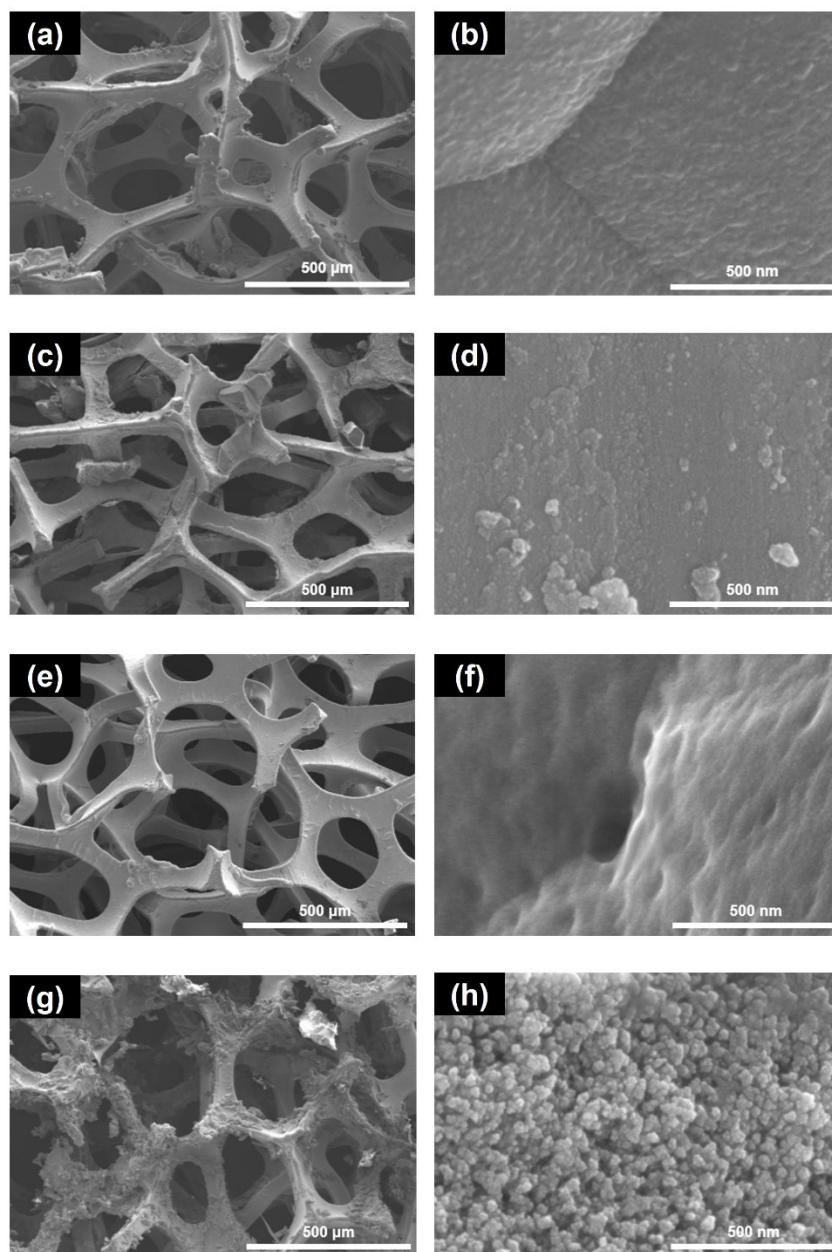

145

146 **Figure S11.** SEM images of Ni-F electrodes (a), (b) after electrochemical oxidation at 1 M  
 147 KOH (alkaline activation), (c), (d) after half-cell neutral OER, (e), (f) after half-cell acidic  
 148 OER, and (g), (h) after CO<sub>2</sub>RR single-cell activity test. ((a), (c), (e), (g): x100 magnification)  
 149 ((b), (d), (f), (h): 100k magnification)

150

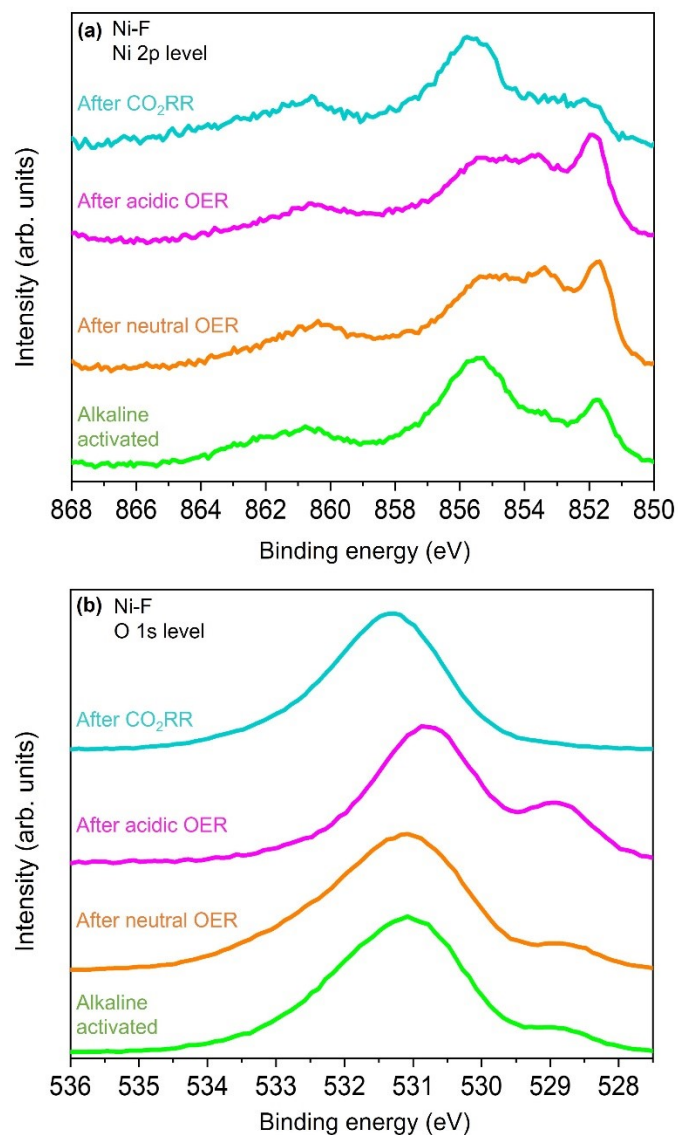

151

152 **Figure S12.** XPS spectra of Ni-F electrodes after alkaline activation, neutral OER, acidic OER,

153 CO<sub>2</sub>RR, (a) Ni 2p level and (b) O 1s level.

154

155

156

157

158

159

160 **Table S1.** Half-cell neutral OER overpotentials for each electrodes (Figure 1g)

| <b>Working electrode</b> | <b>Overpotential (mV)<br/>at 100 mA/cm<sup>2</sup></b> |
|--------------------------|--------------------------------------------------------|
| Ir-Ti mesh               | 637.6                                                  |
| Ni foam                  | 827.0*                                                 |
| NiFe foam                | 640.6                                                  |

161 \* At 10 mA/cm<sup>2</sup>

162

163

164

165

166

167

168

169

170

171

172

173

174

175

176 **Table S2.** ICP-OES analyses of the electrolytes after half-cell, half-cell acidic OER and  
 177 CO<sub>2</sub>RR MEA

| Reactions                     | Anode      | Ni (ppm) | Fe (ppm) | Ir (ppm) | Ag (ppm) |
|-------------------------------|------------|----------|----------|----------|----------|
| Half-cell<br>OER*             | Ni-F       | 1.2      | -        | -        | -        |
| Half-cell<br>OER*             | NiFe-F     | 4.6      | < 1      | -        | -        |
| Half-cell<br>acidic OER*      | Ni-F       | 56.4     | -        | -        | -        |
| Half-cell<br>acidic OER*      | NiFe-F     | 70.5     | 3.3      | -        | -        |
| CO <sub>2</sub> RR<br>(MEA)** | Ni-F       | 20.4     | -        | -        | n.d.     |
| CO <sub>2</sub> RR<br>(MEA)** | NiFe-F     | 87.4     | < 1      | -        | n.d.     |
| CO <sub>2</sub> RR<br>(MEA)** | Ir-Ti mesh | -        | -        | < 1      | n.d.     |

178 \* Electrolytes collected after 20 minutes of OER operation at 400 mA/cm<sup>2</sup>

179 \*\* Electrolytes collected after CO<sub>2</sub>RR operation at 400 mA/cm<sup>2</sup> (Figure 2b)

180

181

182

183

184

185

186 **Table S3.** ICP-OES analyses comparison between pristine Ni-F and alkaline activated Ni-F

187 (dissolution rate comparison in acidic media)

| <b>Element</b> | <b>Pristine<br/>Ni-F (Ni<sup>0</sup>)</b> | <b>Alkaline activated*<br/>Ni-F (Ni<sup>2+</sup>)</b> |
|----------------|-------------------------------------------|-------------------------------------------------------|
| Ni (ppm)**     | 2.7                                       | 5.7                                                   |

188 \* Activated in 1 M KOH solution, at 2 V (vs. RHE) for 5 minutes

189 (Reference electrode: Hg/HgO, Counter electrode: graphite)

190 \*\* Analyzed after treating in H<sub>2</sub>SO<sub>4</sub>/KHCO<sub>3</sub> (~pH 2) solution, at 2 V (vs. RHE) for 2 minutes

191 (Reference electrode: Hg/HgSO<sub>4</sub>, Counter electrode: graphite)

192

193

194

195
